# Supplementary material
Source: publisher site journal article supplement (https://www.dovepress.com/article/310539)
Supplement: Supplementary file 1 [file get_supplementary_file.php]

**Appendix 1: Table S1: The adoption health-related application survey.**

| Specialization | |  | | | | | | | | | | | | | | | | | | | | | | | | | | | | | | | | |
| --- | --- | --- | --- | --- | --- | --- | --- | --- | --- | --- | --- | --- | --- | --- | --- | --- | --- | --- | --- | --- | --- | --- | --- | --- | --- | --- | --- | --- | --- | --- | --- | --- | --- | --- |
| 1_Age | | 1)Under 20 years | | | | | | | | | | | | 2)20-25 years | | | | | | | | | | | | | | 3)Over 25 years | | | | | | |
| 2_Gender | | 1)Male | | | | | | | | | | | | 1)Female | | | | | | | | | | | | | | | | | | | | |
| 3_Level of study | | 1)First Level | | | | 2)Second Level | | | | | | | | | | 3)Third Level | | | | | | | | | | | | | | | | | 4)Fourth Level | |
| 5)Fifth Level | | | | 6)Sixth Level | | | | | | | | | | 7)Seventh Level | | | | | | | | | | | | | | | | | 8)Eighth Level | |
| 4_ What type of smartphone do you own? | | 1)iPhone | | | | | | 2)Android | | | | | | | | | 3)Other *(please specify*) | | | | | | | | | | | | | | | | | |
| 5_Do you have any application (app) related to health in your smartphone? | | 1)No (move to question 21) | | | | | | | | | | | | | | | | | | | | | | 2)yes | | | | | | | | | | |
| 6_How many such apps do you have in your smartphone? | | 1)1-3 | | 2)4-6 | | | | | | 3)7-9 | | | | | | | | 4)10-12 | | | | | | | | | | | 5)more than 12 | | | | | |
| 7_Please choose from the list below all the purposes for which you have an app in your smartphone? | | | | | | | | | | | | | | | | | | | | | | | | | | | | | | | | | | |
| Tracking physical activity  Counting calories  Losing weight  Managing chronic illness such as diabetes/hypertension  Recording menstrual cycle  During pregnancy  Related to child care  Other *(please specify)* ____________________ | | | | | | | | | | | | | | | | | | | | | | | | | | | | | | | | | | |
|
| 8_Please provide the name and subscription of the app type for all the selected purposes . | | | | | | | Application name | | | | | | | | | | | | | | | | | | Free/paid | | | | | | | | | |
| Tracking physical activity | | | | | | |  | | | | | | | | | | | | | | | | | |  | | | | | | | | | |
| Counting calories | | | | | | |  | | | | | | | | | | | | | | | | | |  | | | | | | | | | |
| Losing weight | | | | | | |  | | | | | | | | | | | | | | | | | |  | | | | | | | | | |
| Managing illness | | | | | | |  | | | | | | | | | | | | | | | | | |  | | | | | | | | | |
| Recording menstrual cycle | | | | | | |  | | | | | | | | | | | | | | | | | |  | | | | | | | | | |
| During pregnancy | | | | | | |  | | | | | | | | | | | | | | | | | |  | | | | | | | | | |
| Related to child care | | | | | | |  | | | | | | | | | | | | | | | | | |  | | | | | | | | | |
| Others | | | | | | |  | | | | | | | | | | | | | | | | | |  | | | | | | | | | |
| 9_For how long you are using health related apps? | | | | | | | 1)0 - 6 months | | | | | | | | | | | | 2)7 - 12 months | | | | | | | | | | | | | | | - 2 years |
| 4)More than 2 years | | | | | | | | | | | | Don’t remember the exact time | | | | | | | | | | | | | | | |
| 10_Did you ever pay for a health application? | | | | | | | 1)yes | | | | 2)no | | | | | 3) I don’t remember | | | | | | | | | | | | | | | | | | |
| 11_If yes, how much you pay? | | | 1)Less than 50 SAR | | | | | | | | | | | | 2)50-100SAR | | | | | | | | | | | | | | | 3)150-200SAR | | | | |
| 4)200-300SAR | | | | | | | | | | | | 5)300-400SAR | | | | | | | | | | | | | | | 6)500+SAR | | | | |
| 12_In which language do you prefer to use the application? | | | 1)Arabic | | | | | | 2)English | | | | | | | | | | | 3)Other (please specify) | | | | | | | | | | | | | | |
| 13_If the application is not available in Arabic, do you still download it? | | | 1)yes | | | | | | 2)no | | | | | | | | | | | | | | | | | | | | | | | | | |
| 14_How frequently do you use these apps? | | | 1) Several times a day | | | | | | 2)Once or twice a day | | | | | | | | | | | | | | | | | | 3­)2-3 times a week | | | | | | | |
| 4)Once a week | | | | | | 5)Rarely used | | | | | | | | | | | | | | | | | | 6) Never used | | | | | | | |
| 15_How much time do you spend daily using these apps? | | | 1)1-10 minutes | | | | | | | | | 2)11-20 minutes | | | | | | | | | | | | | | | 3)21-30 minutes | | | | | | | |
| 4)31-40 minutes | | | | | | | | | 5) 41-50 minutes | | | | | | | | | | | | | | 6) 60+ minutes | | | | | | | | |
| 16_ What are the reasons for not using them on a consistent bases ? | | | 1)No time | | | | | | 2) Difficult to use | | | | | | | | | | | | | | | | | 3) Not useful | | | | | | | | |
| 4)Language | | | | | | 5) I don’t have knowledge how to use it. | | | | | | | | | | | | | | | | | | | | | | | | | |
| 17_Do you agree that Health applications help the people to save medical expenses and help them to become more effective in the personal management of their health? | | | | | | | | | | | | | | | | 1)yes | | | | | | 2)no | | | | | | | | | | | 3)I don’t know | |
| 18_What features do you find most useful in a health app? | | | | | | | | | | | | | | | | 1)Ease of use | | | | | | | | | | | | | | | | 2)Easily accessible | | |
| 3)Up to date | | | | | | | | | | | | | | | | 4)cost | | |
| 19_Which specific application would you recommend? | | | | | | | | | | | | | | | |  | | | | | | | | | | | | | | | | | | |
| 20_In your opinion what are the barriers for the use of health applications among students? | | | | | 1) Lack of adequate skill to use application | | | | | | | | | | | | | | | | 2)Lack of support and update of applications by their developers | | | | | | | | | | | | | |
| 3)Lack of knowledge and awareness of application benefits | | | | | | | | | | | | | | | | | | 4) Lack of adequate time to use applications | | | | | | | | | | | |
| 21_What are the reasons for not using any mobile health application? | 1)I am not interested in health apps | | | | | | | | | | | | | | | | | | | | | | 2) They cost too much | | | | | | | | | | | |
| 3) I don’t trust apps to collect my data | | | | | | | | | | | | | | | | | | | | | | 4) Complicated to use | | | | | | | | | | | |
| 5)I don’t have competency to use | | | | | | | | | | | | 6)My health is fit and I don’t need one | | | | | | | | | | | | | | | | | | 7) Lack of recommended by teacher | | | |

**Appendix 2:** Table S2: The names and frequency of the applications recommended by students.

| **App name** | **Frequency** |
| --- | --- |
| صحتي Sehati | 19 |
| Stepz | 8 |
| حياة Hayat | 7 |
| MyFitnessPal | 6 |
| خطواتي (Steps counter) | 5 |
| Fitbit | 4 |
| Myfit | 4 |
| Pacer | 4 |
| سعراتي Soraate (calories counter) | 4 |
| عدد السعرات (calories counter) | 4 |
| عناية Enayeh-period tracker | 4 |
| Gymnadz | 3 |
| Stepapp | 3 |
| الحاسبة الوردية (Menstrual cycle tracker) | 3 |
| طب بيبي TebBaby | 3 |
| طفلي لايف Tefly Life | 3 |
| Apple watch | 2 |
| Exercises 7 minuet | 2 |
| FIO | 2 |
| Fitness | 2 |
| Running | 2 |
| المشخص ALTIBBI | 2 |
| 30 day Fitness | 1 |
| 8 fit | 1 |
| Abs workout | 1 |
| Be fit 21 | 1 |
| BMI | 1 |
| Body temperature | 1 |
| Brian focus | 1 |
| Drugs | 1 |
| During pregnancy | 1 |
| Exercise 7minute | 1 |
| Female fitness | 1 |
| Fitnomy | 1 |
| Get fit | 1 |
| Health activity | 1 |
| Health and sport | 1 |
| Healthcare | 1 |
| Life cycle | 1 |
| Medical Dictionary | 1 |
| medisafe | 1 |
| Medscap | 1 |
| Mifit | 1 |
| Misfit | 1 |
| My fitness pal | 1 |
| P | 1 |
| Period calendar | 1 |
| RD inbut | 1 |
| SFDA | 1 |
| She fit | 1 |
| Transformme | 1 |
| Walking | 1 |
| Water balance | 1 |
| Wight gain | 1 |
| Workout | 1 |
| Workout for women | 1 |
| اسعفني (Saudi Red Crescent Authority app) | 1 |
| تطعيمات (vaccination app) | 1 |
| حاسبة الحمل (pregnancy tracker) | 1 |
| حاسبة الدورة الشهرية (Menstrual cycle tracker) | 1 |
| حميتي (diet) | 1 |
| دربني (Training app) | 1 |
| مجموعة طبيب (promotions and coupons for health and cosmetic services) | 1 |
| منبه المياه (Water drinking reminder) | 1 |
| موعد (online Primary healthcare appointment system) | 1 |
| وزني (Weight) | 1 |
